# Supplementary material for: Factors Influencing Workplace Health Promotion Interventions for Workers in the Semiconductor Industry According to Risk Levels of Chronic Disease
Source: MDPI journal article supplement (doi:10.3390/ijerph182111383), 2021-10-29
Supplement: s1 [file s1]

**Table S1.** Demographic characteristics of workers at risk of chronic diseases at semiconductor/liquid crystal display (LCD) workplaces by their risk classification

| Characteristics         |                                             | Low-risk group, n (%) |        | Intermediate-risk group, n (%) |        | High-risk group, n (%) |        |
|-------------------------|---------------------------------------------|-----------------------|--------|--------------------------------|--------|------------------------|--------|
| general characteristics | total                                       | 3,961                 | (45.6) | 3,792                          | (43.7) | 929                    | (10.7) |
|                         | sex                                         |                       |        |                                |        |                        |        |
|                         | male                                        | 3,148                 | (42.2) | 3,503                          | (46.9) | 813                    | (10.9) |
|                         | female                                      | 813                   | (66.7) | 289                            | (23.7) | 116                    | (9.5)  |
|                         | age groups                                  |                       |        |                                |        |                        |        |
|                         | ≤ 20's                                      | 480                   | (59.9) | 241                            | (30.0) | 81                     | (10.1) |
|                         | 30's                                        | 2,140                 | (47.5) | 1,948                          | (43.2) | 421                    | (9.3)  |
|                         | 40's                                        | 1,189                 | (40.0) | 1,415                          | (47.6) | 366                    | (12.3) |
|                         | ≥ 50's                                      | 152                   | (37.9) | 188                            | (46.9) | 61                     | (15.2) |
|                         | division                                    |                       |        |                                |        |                        |        |
| work characteristics    | device solution                             | 3,367                 | (44.5) | 3,374                          | (44.6) | 822                    | (10.9) |
|                         | LCD                                         | 594                   | (53.1) | 418                            | (37.4) | 107                    | (9.6)  |
|                         | work type                                   |                       |        |                                |        |                        |        |
|                         | office work                                 | 1,746                 | (44.5) | 1,784                          | (45.4) | 398                    | (10.1) |
|                         | production                                  | 2,215                 | (46.6) | 2,008                          | (42.2) | 531                    | (11.2) |
|                         | industry                                    |                       |        |                                |        |                        |        |
|                         | fabrication                                 | 1,706                 | (48.1) | 1,434                          | (40.5) | 404                    | (11.4) |
|                         | support                                     | 325                   | (46.6) | 295                            | (42.3) | 78                     | (11.2) |
|                         | development                                 | 1,921                 | (43.4) | 2,056                          | (46.5) | 447                    | (10.1) |
|                         | part-time                                   | 9                     | (56.3) | 7                              | (43.8) | 0                      | (0.0)  |
|                         | type of work shift                          |                       |        |                                |        |                        |        |
|                         | normal working hours                        | 3,109                 | (43.9) | 3,215                          | (45.4) | 758                    | (10.7) |
|                         | 4 sets of 3 shifts                          | 612                   | (58.8) | 325                            | (31.3) | 103                    | (9.9)  |
|                         | variable shift                              | 231                   | (42.5) | 245                            | (45.0) | 68                     | (12.5) |
|                         | flexible schedule                           | 9                     | (56.3) | 7                              | (43.8) | 0                      | (0.0)  |
|                         | physical activities at the workplace, hours |                       |        |                                |        |                        |        |
|                         | < 2                                         | 2,565                 | (45.3) | 2,510                          | (44.3) | 592                    | (10.4) |
|                         | 2 to < 4                                    | 1,213                 | (44.2) | 1,216                          | (44.3) | 313                    | (11.4) |
|                         | 4 to < 6                                    | 183                   | (67.0) | 66                             | (24.2) | 24                     | (8.8)  |
|                         | workplace                                   |                       |        |                                |        |                        |        |
|                         | A                                           | 864                   | (42.8) | 917                            | (45.4) | 238                    | (11.8) |

| Characteristics                     |                             | Low-risk group, n (%) |        | Intermediate-risk group, n (%) |        | High-risk group, n (%) |        |
|-------------------------------------|-----------------------------|-----------------------|--------|--------------------------------|--------|------------------------|--------|
| household<br>information            | B                           | 1,551                 | (45.0) | 1,513                          | (43.9) | 382                    | (11.1) |
|                                     | C                           | 555                   | (42.4) | 637                            | (48.6) | 118                    | (9.0)  |
|                                     | D                           | 436                   | (50.9) | 329                            | (38.4) | 92                     | (10.7) |
|                                     | E                           | 555                   | (52.9) | 396                            | (37.7) | 99                     | (9.4)  |
|                                     | duration employed, years    |                       |        |                                |        |                        |        |
|                                     | ≤ 5                         | 499                   | (50.0) | 408                            | (40.9) | 91                     | (9.1)  |
|                                     | 6–10                        | 1,108                 | (48.7) | 941                            | (41.3) | 227                    | (10.0) |
|                                     | 11–20                       | 1,701                 | (44.7) | 1,728                          | (45.4) | 377                    | (9.9)  |
|                                     | > 20                        | 653                   | (40.8) | 715                            | (44.6) | 234                    | (14.6) |
|                                     | number of household members |                       |        |                                |        |                        |        |
|                                     | 1                           | 388                   | (47.7) | 322                            | (39.6) | 104                    | (12.8) |
|                                     | 2                           | 475                   | (46.7) | 449                            | (44.1) | 94                     | (9.2)  |
|                                     | 3–5                         | 2,829                 | (45.3) | 2,750                          | (44.1) | 662                    | (10.6) |
|                                     | 6–9                         | 269                   | (44.2) | 271                            | (44.5) | 69                     | (11.3) |
|                                     | household types             |                       |        |                                |        |                        |        |
|                                     | single-person household     | 388                   | (47.7) | 322                            | (39.6) | 104                    | (12.8) |
|                                     | couple                      | 363                   | (46.3) | 363                            | (46.3) | 58                     | (7.4)  |
|                                     | couple + children           | 1,764                 | (42.9) | 1,913                          | (46.5) | 436                    | (10.6) |
|                                     | couple + parents            | 160                   | (45.7) | 154                            | (44.0) | 36                     | (10.3) |
|                                     | couple + children + parents | 519                   | (43.8) | 539                            | (45.4) | 128                    | (10.8) |
|                                     | others                      | 767                   | (53.4) | 501                            | (34.9) | 167                    | (11.6) |
| exposure to<br>hazardous<br>factors | dormitory                   |                       |        |                                |        |                        |        |
|                                     | yes                         | 3,850                 | (45.4) | 3,720                          | (43.9) | 906                    | (10.7) |
|                                     | no                          | 111                   | (53.9) | 72                             | (35.0) | 23                     | (11.2) |
|                                     | special health checkups     |                       |        |                                |        |                        |        |
|                                     | not applicable              | 1,458                 | (43.0) | 1,556                          | (45.9) | 373                    | (11.0) |
|                                     | subject of examination      | 2,503                 | (47.3) | 2,236                          | (42.2) | 556                    | (10.5) |

**Table S2.** Demographic characteristics of employees at semiconductor/liquid crystal display (LCD) workplaces by risk group of cardiovascular diseases

| Characteristics         |                                             | 10-year ASCVD risk score, n (%) |         |        |       | Framingham risk score, n (%) |         |             |         |       |       |
|-------------------------|---------------------------------------------|---------------------------------|---------|--------|-------|------------------------------|---------|-------------|---------|-------|-------|
|                         |                                             | < 7.5%                          |         | ≥ 7.5% |       | < 10%                        |         | 10 to < 20% |         | ≥ 20% |       |
| general characteristics | total                                       | 7,352                           | (98.7)  | 95     | (1.3) | 23,005                       | (87.0)  | 2,965       | (11.2)  | 486   | (1.8) |
|                         | sex                                         |                                 |         |        |       |                              |         |             |         |       |       |
|                         | male                                        | 6,898                           | (98.7)  | 89     | (1.3) | 17,195                       | (83.3)  | 2,964       | (14.4)  | 486   | (2.4) |
|                         | female                                      | 454                             | (98.7)  | 6      | (1.3) | 5,810                        | (100.0) | 1           | (< 0.1) | 0     | NA    |
|                         | age groups                                  |                                 |         |        |       |                              |         |             |         |       |       |
|                         | ≤ 20's                                      | 0                               | NA      | 0      | NA    | 0                            | NA      | 0           | NA      | 0     | NA    |
|                         | 30's                                        | 0                               | NA      | 0      | NA    | 17,318                       | (92.4)  | 1,220       | (6.5)   | 195   | (1.0) |
|                         | 40's                                        | 6,691                           | (99.3)  | 47     | (0.7) | 5,294                        | (75.6)  | 1,450       | (20.7)  | 263   | (3.8) |
|                         | ≥ 50's                                      | 661                             | (93.2)  | 48     | (6.8) | 393                          | (54.9)  | 295         | (41.2)  | 28    | (3.9) |
|                         | Division                                    |                                 |         |        |       |                              |         |             |         |       |       |
| work characteristics    | device solution                             | 6,849                           | (98.8)  | 86     | (1.2) | 20,187                       | (86.7)  | 2,664       | (11.4)  | 438   | (1.9) |
|                         | LCD                                         | 503                             | (98.2)  | 9      | (1.8) | 2,818                        | (89.0)  | 301         | (9.5)   | 48    | (1.5) |
|                         | work type                                   |                                 |         |        |       |                              |         |             |         |       |       |
|                         | office work                                 | 4,525                           | (98.5)  | 71     | (0.4) | 10,665                       | (85.4)  | 1,581       | (12.7)  | 244   | (2.0) |
|                         | production                                  | 2,827                           | (99.2)  | 24     | (0.1) | 12,340                       | (88.4)  | 1,384       | (9.9)   | 242   | (1.7) |
|                         | Industry                                    |                                 |         |        |       |                              |         |             |         |       |       |
|                         | fabrication                                 | 1,722                           | (99.0)  | 18     | (1.0) | 9,010                        | (89.2)  | 930         | (9.2)   | 165   | (1.6) |
|                         | support                                     | 851                             | (97.5)  | 22     | (2.5) | 1,813                        | (83.4)  | 308         | (14.2)  | 54    | (2.5) |
|                         | development                                 | 4,740                           | (98.9)  | 54     | (1.1) | 12,051                       | (85.8)  | 1,727       | (12.3)  | 267   | (1.9) |
|                         | part-time                                   | 39                              | (97.5)  | 1      | (2.5) | 131                          | (100.0) | 0           | NA      | 0     | NA    |
|                         | type of work shift                          |                                 |         |        |       |                              |         |             |         |       |       |
|                         | normal working hours                        | 7,139                           | (98.8)  | 90     | (1.2) | 18,138                       | (84.9)  | 2,791       | (13.1)  | 440   | (2.1) |
|                         | 4 sets of 3 shifts                          | 124                             | (97.6)  | 3      | (2.4) | 3,220                        | (96.4)  | 93          | (2.8)   | 28    | (0.8) |
|                         | variable shift                              | 50                              | (98.0)  | 1      | (2.0) | 1,516                        | (93.9)  | 81          | (5.0)   | 18    | (1.1) |
|                         | flexible schedule                           | 39                              | (97.5)  | 1      | (2.5) | 131                          | (100.0) | 0           | NA      | 0     | NA    |
|                         | physical activities at the workplace, hours |                                 |         |        |       |                              |         |             |         |       |       |
|                         | < 2                                         | 5,788                           | (98.7)  | 76     | (1.3) | 15,721                       | (86.8)  | 2,058       | (11.4)  | 325   | (1.8) |
|                         | 2 to < 4                                    | 1,528                           | (98.8)  | 19     | (1.2) | 6,290                        | (85.6)  | 897         | (12.2)  | 161   | (2.2) |
|                         | 4 to < 6                                    | 36                              | (100.0) | 0      | NA    | 994                          | (99.0)  | 10          | (1.0)   | 0     | NA    |
|                         | workplace                                   |                                 |         |        |       |                              |         |             |         |       |       |
|                         | A                                           | 1,839                           | (98.6)  | 27     | (1.4) | 5,234                        | (86.3)  | 694         | (11.4)  | 137   | (2.3) |
|                         | B                                           | 2,999                           | (99.0)  | 29     | (1.0) | 8,977                        | (86.2)  | 1,257       | (12.1)  | 182   | (1.7) |

| Characteristics               |                             | 10-year ASCVD risk score, n (%) |         |        |       | Framingham risk score, n (%) |        |             |        |       |       |
|-------------------------------|-----------------------------|---------------------------------|---------|--------|-------|------------------------------|--------|-------------|--------|-------|-------|
|                               |                             | < 7.5%                          |         | ≥ 7.5% |       | < 10%                        |        | 10 to < 20% |        | ≥ 20% |       |
| life characteristics          | C                           | 1,547                           | (98.7)  | 20     | (1.3) | 3,832                        | (87.0) | 501         | (11.4) | 71    | (1.6) |
|                               | D                           | 521                             | (97.9)  | 11     | (2.1) | 2,298                        | (89.0) | 233         | (9.0)  | 52    | (2.0) |
|                               | E                           | 446                             | (98.2)  | 8      | (1.8) | 2,664                        | (89.2) | 280         | (9.4)  | 44    | (1.5) |
|                               | duration employed, years    |                                 |         |        |       |                              |        |             |        |       |       |
|                               | ≤ 5                         | 274                             | (98.6)  | 4      | (1.4) | 3,444                        | (95.8) | 129         | (3.6)  | 23    | (0.6) |
|                               | 6–10                        | 545                             | (99.3)  | 4      | (0.7) | 6,577                        | (93.6) | 393         | (5.6)  | 57    | (0.8) |
|                               | 11–20                       | 3,385                           | (99.4)  | 20     | (0.6) | 10,683                       | (86.6) | 1,429       | (11.6) | 228   | (1.8) |
|                               | > 20                        | 3,148                           | (97.9)  | 67     | (2.1) | 2,301                        | (65.9) | 1,014       | (29.0) | 178   | (5.1) |
|                               | number of household members |                                 |         |        |       |                              |        |             |        |       |       |
|                               | 1                           | 198                             | (98.5)  | 3      | (1.5) | 2,752                        | (95.9) | 94          | (3.3)  | 24    | (0.8) |
|                               | 2                           | 431                             | (98.2)  | 8      | (1.8) | 3,500                        | (93.4) | 211         | (5.6)  | 38    | (1.0) |
|                               | 3–5                         | 6,046                           | (98.7)  | 81     | (1.3) | 15,359                       | (84.7) | 2,377       | (13.1) | 391   | (2.2) |
|                               | 6–9                         | 677                             | (99.6)  | 3      | (0.4) | 1,394                        | (81.5) | 283         | (16.5) | 33    | (1.9) |
|                               | household types             |                                 |         |        |       |                              |        |             |        |       |       |
|                               | single-person household     | 198                             | (98.5)  | 3      | (1.5) | 2,752                        | (95.9) | 94          | (3.3)  | 24    | (0.8) |
|                               | couple                      | 339                             | (97.7)  | 8      | (2.3) | 2,802                        | (93.0) | 178         | (5.9)  | 33    | (1.1) |
|                               | couple + children           | 5,100                           | (98.7)  | 69     | (1.3) | 9,415                        | (80.8) | 1,911       | (16.4) | 326   | (2.8) |
|                               | couple + parents            | 103                             | (100.0) | 0      | NA    | 1,296                        | (94.1) | 72          | (5.2)  | 9     | (0.7) |
|                               | couple + children + parents | 1,303                           | (99.2)  | 11     | (0.8) | 2,779                        | (82.3) | 530         | (15.7) | 67    | (2.0) |
|                               | others                      | 309                             | (98.7)  | 4      | (1.3) | 3,961                        | (95.0) | 180         | (4.3)  | 27    | (0.6) |
|                               | dormitory                   |                                 |         |        |       |                              |        |             |        |       |       |
|                               | yes                         | 7,337                           | (98.7)  | 94     | (1.3) | 22,694                       | (86.8) | 2,954       | (11.3) | 485   | (1.9) |
|                               | no                          | 15                              | (93.8)  | 1      | (6.3) | 311                          | (96.3) | 11          | (3.4)  | 1     | (0.3) |
| exposure to hazardous factors | special health checkups     |                                 |         |        |       |                              |        |             |        |       |       |
|                               | not applicable              | 4,245                           | (98.6)  | 61     | (1.4) | 8,552                        | (83.2) | 1,484       | (14.4) | 247   | (2.4) |
|                               | subject of examination      | 3,107                           | (98.9)  | 34     | (1.1) | 14,453                       | (89.4) | 1,481       | (9.2)  | 239   | (1.5) |

**Table S3.** Participation in workplace health promotion (WHP) programs of employees of semiconductor/liquid crystal display (LCD) workplace by risk levels of chronic diseases

| Criteria                                                         | Classification                          | Number of<br>workers in each<br>health-risk group | WHP<br>participants,<br>n (% <sup>a</sup> ) |         | WHP                                 |         |                                           |         |                                                   |         |                                    |         |       |
|------------------------------------------------------------------|-----------------------------------------|---------------------------------------------------|---------------------------------------------|---------|-------------------------------------|---------|-------------------------------------------|---------|---------------------------------------------------|---------|------------------------------------|---------|-------|
|                                                                  |                                         |                                                   |                                             |         | Health camp,<br>n (% <sup>a</sup> ) |         | Personal training,<br>n (% <sup>a</sup> ) |         | Musculoskeletal<br>exercises, n (% <sup>a</sup> ) |         | Counseling,<br>n (% <sup>a</sup> ) |         |       |
| risk levels of<br>chronic diseases                               | total                                   | 39,073                                            | 457                                         | (1.2)   | 28                                  | (0.1)   | 23                                        | (0.1)   | 99                                                | (0.3)   | 381                                | (1.0)   |       |
|                                                                  | healthy workers                         | 22,342                                            | 5                                           | (< 0.1) | 0                                   | NA      | 1                                         | (< 0.1) | 1                                                 | (< 0.1) | 3                                  | (< 0.1) |       |
|                                                                  | suspicious cases of<br>chronic diseases | 7,865                                             | 40                                          | (0.5)   | 1                                   | (< 0.1) | 3                                         | (< 0.1) | 12                                                | (0.2)   | 33                                 | (0.4)   |       |
|                                                                  | workers at risk of chronic diseases     |                                                   |                                             |         |                                     |         |                                           |         |                                                   |         |                                    |         |       |
| risk classification<br>in workers at risk<br>of chronic diseases | chronic diseases <sup>b</sup>           | 8,682                                             | 407                                         | (4.7)   | 27                                  | (0.3)   | 19                                        | (0.2)   | 86                                                | (1.0)   | 340                                | (3.9)   |       |
|                                                                  | hypertension                            | 3,389                                             | 271                                         | (8.0)   | 16                                  | (0.5)   | 10                                        | (0.3)   | 50                                                | (1.5)   | 234                                | (6.9)   |       |
|                                                                  | diabetes                                | 528                                               | 143                                         | (27.1)  | 11                                  | (2.1)   | 3                                         | (0.6)   | 38                                                | (7.2)   | 119                                | (22.5)  |       |
|                                                                  | dyslipidemia                            | 6,379                                             | 242                                         | (3.8)   | 16                                  | (0.3)   | 16                                        | (0.3)   | 58                                                | (0.9)   | 196                                | (3.1)   |       |
|                                                                  | low-risk group                          | 3,961                                             | 31                                          | (0.8)   | 5                                   | (0.1)   | 0                                         | NA      | 12                                                | (0.3)   | 25                                 | (0.6)   |       |
|                                                                  | intermediate-risk group                 | 3,792                                             | 108                                         | (2.8)   | 10                                  | (0.3)   | 10                                        | (0.3)   | 10                                                | (0.3)   | 91                                 | (2.4)   |       |
|                                                                  | high-risk group                         | 929                                               | 268                                         | (28.8)  | 12                                  | (1.3)   | 9                                         | (1.0)   | 64                                                | (6.9)   | 224                                | (24.1)  |       |
|                                                                  | 10-year ASCVD<br>risk score             | < 7.5%                                            | 7,352                                       | 159     | (2.2)                               | 16      | (0.2)                                     | 7       | (0.1)                                             | 42      | (0.6)                              | 123     | (1.7) |
|                                                                  |                                         | ≥ 7.5%                                            | 95                                          | 11      | (11.6)                              | 0       | NA                                        | 0       | NA                                                | 5       | (5.3)                              | 9       | (9.5) |
|                                                                  | Framingham risk<br>score                | < 10%                                             | 23,005                                      | 284     | (1.2)                               | 18      | (0.1)                                     | 14      | (0.1)                                             | 59      | (0.3)                              | 235     | (1.0) |
|                                                                  | 10 to < 20%                             | 2,965                                             | 73                                          | (2.5)   | 8                                   | (0.3)   | 5                                         | (0.2)   | 23                                                | (0.8)   | 57                                 | (1.9)   |       |
|                                                                  | ≥ 20%                                   | 486                                               | 29                                          | (6.0)   | 0                                   | NA      | 2                                         | (0.4)   | 4                                                 | (0.8)   | 26                                 | (5.3)   |       |

Abbreviation: ASCVD, atherosclerotic cardiovascular disease

<sup>a</sup> Proportion of the participants in WHP activities to the total number of workers in each health-risk classification.

<sup>b</sup> Hypertension, diabetes, or dyslipidemia
